# Supplementary material for: Identification of food sources in tropical seagrass bed food web using triple stable isotopes and fatty acid signatures
Source: Frontiers journal article supplement (doi:10.3389/fmars.2023.1093181), 2023-07-21
Supplement: Table_1.docx [file Table_1.docx]

**Supporting information S1**

**Identification of food sources in tropical seagrass bed food web using triple stable isotopes and fatty acid signatures**

**Authors:** Lijun Cui1,4, Zhijian Jiang1*,2,3,4, Xiaoping Huang1*,2,3,4, Songlin Liu1,2,3, Yunchao Wu1,2,3

Table A1. The δ13C, δ15N and δ34S (mean ± SD) of food sources and macrobenthos in summer and winter in Xincun Bay.

|  | Summer | | |  | Winter | | |
| --- | --- | --- | --- | --- | --- | --- | --- |
|  | δ13C | δ15N | δ34S |  | δ13C | δ15N | δ34S |
| **Food sources** | |  |  |  |  |  |  |
| Seagrass | -10±1 | 6.2±0.4 | 10.2±0.8 |  | -9.9±0.4 | 6.7±0.7 | 11.3±1.2 |
| Epiphytes | -11.6±1.9 | 6.8±1.6 | 12.6±2.2 |  | -10.9±2.2 | 7.8±0.4 | 9.6±2 |
| Macroalgae | -8.4±0 | 8.6±0.4 | 17.4±0.2 |  | -13.5±0.2 | 8.5±1 | 17.4±0.2 |
| SPOM | -16.4±0.9 | 5.7±0.7 | - |  | -18.6±0.9 | 5.5±0.2 | - |
| SOM | -15.3±0.7 | 5.4±1.1 | 8±2.1 |  | -15.4±1.4 | 6.7±0.5 | 5.6±2.5 |
| **Snails** |  |  |  |  |  |  |  |
| *Notosinister subaura* | -10±0 | 8±0 | 8.8±0 |  | -7.3±0.5 | 8.5±0.5 | 10.3±0.5 |
| **Crustaceans** | |  |  |  |  |  |  |
| *Calappa sp.* | -14.5±0.4 | 10.1±0.5 | 15.8±0.5 |  | -15.8±0.2 | 10.9±0.1 | 18.3±0.5 |
| *Menippe rumphii* | -14.2±0 | 12.1±0.7 | 15.9±0 |  | -14.4±0.2 | 11±0.2 | 17.1±0.6 |
| *Portunus sanguinolentus* | -14.8±0 | 11.7±0 | 16.1±0 |  | -15.3±0 | 11.4±0 | 16.3±0 |
| *Thalamita crenata* | -10.9±0.9 | 11.2±0.1 | 14.3±3.6 |  | -13.8±0 | 11.7±0.3 | 14.3±1.1 |
| **Bivalves** |  |  |  |  |  |  |  |
| *Perna viridis* | -15±0 | 9.5±0.3 | 10.1±1.6 |  | -14.8±1.1 | 8.2±1.3 | 15.8±1 |
| *Scapharca subcrenata* | -14.7±0.2 | 9.6±0.2 | 14.3±0 |  | -15.6±0 | 8.4±0.3 | 13.6±0 |
| **Polychaetes** | |  |  |  |  |  |  |
| *Arenicola cristata* | -10.8±0.3 | 8.7±0.5 | 8.8±1.9 |  | -11±1.6 | 9.1±1.5 | 14.2±1.4 |

Table A2 Result of Post-hoc test for the food sources between summer and winter. Bold-face font indicates no significance at *p* > 0.05. Sgs, Epi and Mac represent seagrass, epiphytic and macroalgae, respectively. A *p*-value of 0 indicates that the actual *p*-value < 0.001.

|  | δ13C | | | |  | δ15N | | | |  | δ34S | | | |
| --- | --- | --- | --- | --- | --- | --- | --- | --- | --- | --- | --- | --- | --- | --- |
|  | Sgs | Epi | Mac | SPOM |  | Sgs | Epi | Mac | POM |  | Sgs | Epi | Mac | SPOM |
| Epi | **0.229** |  |  |  |  | **0.317** |  |  |  |  | **0.923** |  |  |  |
| Mac | **0.644** | **0.994** |  |  |  | 0.001 | **0.081** |  |  |  | 0 | 0 |  |  |
| SPOM | 0 | 0 | 0 |  |  | **0.397** | 0.016 | 0 |  |  |  |  |  |  |
| SOM | 0 | 0 | 0 | **0.103** |  | **0.907** | **0.128** | 0 | **0.929** |  | 0.001 | 0 | 0 |  |

Table A3 Proportional fatty acid composition (mean ± SE %) of food sources and macrobenthos in Xincun Bay.

| Species | 14:0 | 15:0 | 16:0 | 17:0 | 18:0 | 20:0 | 21:0 | 22:0 | 14:1n5 | 15:1n5 | 16:1n7 | 17:1n7 | 18:1n9t | 18:1n9c | 20:1 | 18:3n3 | 20:5n3 | 22:6n3 | 18:2n6t | 18:2n6c | 18:3n6 |
| --- | --- | --- | --- | --- | --- | --- | --- | --- | --- | --- | --- | --- | --- | --- | --- | --- | --- | --- | --- | --- | --- |
| **Summer** |  |  |  |  |  |  |  |  |  |  |  |  |  |  |  |  |  |  |  |  |  |
| **Food sources** | |  |  |  |  |  |  |  |  |  |  |  |  |  |  |  |  |  |  |  |  |
| Seagrass | 1.8 (0.2) | 1.3 (0.3) | 44.5 (3) | 1.1 (0.1) | 12 (1.2) | 1.2 (0.1) | 0.8 (0.1) | 1.3 (0.1) | 0.6 (0.1) | 4.7 (1.3) | 1.8 (0.5) | 0.8 (0.1) | 0.7 (0.1) | 4.9 (1.7) | 0.7 (0.1) | 9.5 (4) | 0 (0) | 0.8 (0.1) | 0 (0) | 10.7 (2.9) | 0.7 (0.1) |
| Epiphytes | 7.3 (3.2) | 1.7 (0.3) | 40 (5.6) | 2.4 (0.6) | 17.5 (3.9) | 1.2 (0.2) | 0.8 (0.2) | 1.2 (0.2) | 0.7 (0.1) | 1.3 (0.1) | 10 (2.1) | 0.9 (0.3) | 1 (0.3) | 4.5 (1.3) | 0.9 (0.1) | 1.4 (0.4) | 1.4 (1.6) | 2.9 (1.9) | 0.3 (0.4) | 1.6 (0.4) | 0.9 (0.4) |
| Macroalgae | 1.5 (0.5) | 1.3 (0.4) | 58.1 (5) | 1.2 (0.3) | 13.5 (3.3) | 1.2 (0.2) | 0.8 (0.3) | 2.5 (0.1) | 0.7 (0.2) | 2.4 (0.3) | 2.8 (0.2) | 1.1 (0.4) | 0.7 (0.5) | 3.6 (0.7) | 0.8 (0.2) | 3.4 (1.1) | 0 (0) | 1 (0.4) | 0 (0) | 2.4 (0.4) | 0.9 (0.2) |
| SPOM | 4.8 (2.2) | 2.4 (0.2) | 33.8 (0.8) | 2.6 (0.3) | 25.6 (2.1) | 2.5 (0.3) | 2 (0.2) | 2.7 (0.3) | 1.7 (0.2) | 2 (0.2) | 3.8 (1.4) | 1.4 (1) | 1.3 (1) | 2.3 (0.2) | 1.8 (0.2) | 2 (0.2) | 0 (0) | 2.6 (0.1) | 0.8 (1.2) | 1.9 (0.1) | 2 (0.2) |
| SOM | 3 (0.2) | 3 (0.2) | 29.6 (0.9) | 3.7 (0.2) | 14.5 (0.7) | 3.4 (0.1) | 3.2 (0.2) | 3.6 (0.1) | 2.4 (0) | 2.9 (0.1) | 3.5 (0.4) | 3.3 (0.1) | 3.4 (0.2) | 3.1 (0.2) | 1.4 (1.4) | 3.1 (0.2) | 3.2 (0.2) | 3.7 (0.2) | 0 (0) | 3 (0.2) | 3.1 (0.1) |
| **Snails** |  |  |  |  |  |  |  |  |  |  |  |  |  |  |  |  |  |  |  |  |  |
| *Notosinister subaura* | 3.53 | 1.86 | 23.5 | 3.86 | 26.97 | 1.06 | 0.74 | 1.02 | 0.64 | 1.86 | 2.19 | 0.88 | 0.79 | 8.01 | 0.88 | 2.48 | 7.16 | 5.09 | 1.06 | 5.59 | 0.84 |
| **Crustaceans** | |  |  |  |  |  |  |  |  |  |  |  |  |  |  |  |  |  |  |  |  |
| *Calappa sp.* | 1.4 (0.3) | 1.4 (0.3) | 27.2 (6) | 2.8 (0.5) | 22.3 (3.1) | 1.2 (0.5) | 1 (0.5) | 1.2 (0.6) | 0.7 (0.4) | 0.9 (0.5) | 4.7 (1) | 0.6 (0.5) | 1 (0.5) | 10.3 (3.2) | 1.2 (0.3) | 1.2 (0.3) | 10.3 (9.3) | 6.5 (5.4) | 0.9 (0.8) | 2.3 (0.4) | 0.9 (0.4) |
| *Portunus sanguinolentus* | 2.21 | 2.27 | 26.07 | 4.03 | 16.32 | 2.51 | 2.12 | 2.36 | 1.58 | 1.91 | 2.71 | 2.28 | 2.25 | 6.76 | 6.05 | 2.17 | 2.16 | 5.54 | 3.77 | 2.25 | 2.68 |
| *Thalamita crenata* | 0.9 (0.1) | 1.5 (0.1) | 28.1 (2.4) | 2.9 (0.1) | 20.4 (2.2) | 0.6 (0.1) | 0.3 (0) | 0.4 (0) | 0.2 (0) | 0.3 (0) | 4.6 (0) | 1 (0.6) | 0.4 (0) | 18.4 (1) | 0.6 (0) | 0.8 (0.1) | 9.4 (1.4) | 4.8 (0.8) | 0.4 (0.1) | 3.5 (0.6) | 0.4 (0) |
| *Menippe rumphii* | 2.2 (0.6) | 3.3 (0.3) | 14.8 (4.2) | 5.7 (1.3) | 17.6 (6) | 3.3 (0) | 3.1 (0.3) | 3.4 (0.3) | 2.3 (0.3) | 3 (0.4) | 3 (0.3) | 3.1 (0.3) | 3.4 (0.2) | 4.9 (0.1) | 3.6 (0.4) | 3.1 (0.3) | 4.7 (0.9) | 5.6 (0.4) | 3.8 (0.7) | 3.2 (0) | 3.1 (0.4) |
| **Bivalves** |  |  |  |  |  |  |  |  |  |  |  |  |  |  |  |  |  |  |  |  |  |
| *Scapharca subcrenata* | 1.62 | 1.32 | 36.39 | 4.22 | 27.25 | 1.18 | 1.03 | 1.23 | 0.73 | 0.96 | 2.15 | 1.02 | 1.1 | 2.89 | 1.9 | 1.36 | 2.24 | 6.23 | 1.14 | 2.98 | 1.05 |
| *Perna viridis* | 7 (0) | 1.9 (0.3) | 33.6 (2.8) | 3 (0) | 14 (1.9) | 1.6 (0.3) | 1.4 (0.3) | 1.6 (0.3) | 1.1 (0.2) | 1.3 (0.2) | 8.3 (0.2) | 1.5 (0.3) | 1.5 (0.3) | 2.2 (0.2) | 2.4 (0.5) | 1.7 (0.3) | 4.5 (0.8) | 4.4 (0.7) | 2.2 (0.4) | 3.3 (0.9) | 1.4 (0.3) |
| **Polychaetes** | |  |  |  |  |  |  |  |  |  |  |  |  |  |  |  |  |  |  |  |  |
| *Arenicola cristata* | 5.1 (1.5) | 5.5 (0.9) | 25.8 (0.7) | 8 (0.6) | 26.5 (1.2) | 1.1 (0.2) | 1.1 (0.1) | 1.7 (0) | 0.2 (0.2) | 0.7 (0.1) | 3.5 (0.2) | 0.9 (0.1) | 1.1 (0.2) | 5.1 (0.1) | 2.4 (0.1) | 2.4 (0.1) | 3.3 (0.3) | 0.8 (0.2) | 0.9 (0.1) | 3.3 (0) | 0.8 (0.1) |
| **Winter** |  |  |  |  |  |  |  |  |  |  |  |  |  |  |  |  |  |  |  |  |  |
| **Food sources** | |  |  |  |  |  |  |  |  |  |  |  |  |  |  |  |  |  |  |  |  |
| Seagrass | 1.2 (0.1) | 1 (0.4) | 40.5 (3.5) | 0.7 (0.1) | 9.7 (1) | 1 (0.1) | 0.4 (0.1) | 1.3 (0.1) | 0.2 (0) | 0.2 (0) | 0.7 (0.2) | 0.3 (0) | 0.3 (0) | 2.7 (0.5) | 0.4 (0) | 22.3 (2.3) | 0.3 (0) | 0.3 (0) | 0.3 (0) | 16 (3.2) | 0.3 (0) |
| Epiphytes | 5.5 (0.8) | 1.3 (0.1) | 47.6 (2.6) | 1.6 (0.3) | 12.2 (2.2) | 1 (0.2) | 0.5 (0.1) | 1.6 (0.1) | 0.3 (0.1) | 0.3 (0.1) | 6.2 (0.9) | 0.4 (0.1) | 0.5 (0.1) | 6.7 (1.2) | 0.7 (0.1) | 6.8 (2.7) | 1.6 (0.3) | 1.6 (0.3) | 0.4 (0.1) | 2.3 (0.4) | 0.8 (0.1) |
| Macroalgae | 1.3 (0.2) | 1.1 (0) | 56 (12.6) | 1.1 (0.3) | 8.2 (3.6) | 1.1 (0.3) | 0.8 (0.3) | 2.2 (0.5) | 0.6 (0.1) | 0.7 (0.2) | 2.4 (1.1) | 0.9 (0.1) | 0.8 (0.2) | 2.9 (0.5) | 0.8 (0.2) | 8.8 (4.2) | 0.8 (0.2) | 0.9 (0.2) | 0.9 (0.2) | 6.8 (4.3) | 0.8 (0.2) |
| POM | 3.7 (0.8) | 2.2 (0.3) | 36.7 (3.8) | 2.8 (0.3) | 17.8 (1.6) | 2.5 (0.3) | 2.1 (0.5) | 2.6 (0.5) | 1.7 (0.4) | 1.9 (0.5) | 3 (0.3) | 1.4 (1.4) | 2.3 (0.6) | 2.7 (0.1) | 1.9 (0.4) | 2.1 (0.5) | 2.9 (0.3) | 3.3 (0.3) | 2.4 (0.6) | 2.1 (0.4) | 2 (0.5) |
| SOM | 2.2 (0.1) | 2 (0.1) | 38.2 (0.4) | 2.7 (0.1) | 24 (0.4) | 2.5 (0.1) | 2.2 (0.1) | 3.3 (0.1) | 1.5 (0.1) | 1.9 (0.1) | 2 (0.1) | 2.1 (0.1) | 2.1 (0.1) | 1.9 (0.1) | 1.8 (0.1) | 1.4 (1) | 2 (0.1) | 2.3 (0.1) | 0.7 (1) | 1.9 (0.1) | 1.3 (0.9) |
| **Snails** |  |  |  |  |  |  |  |  |  |  |  |  |  |  |  |  |  |  |  |  |  |
| *Notosinister subaura* | 3.49 | 2.52 | 29.45 | 4.08 | 19.65 | 2.39 | 2.25 | 2.51 | 1.66 | 2.06 | 2.76 | 0 | 2.43 | 4.39 | 2.06 | 2.43 | 5.32 | 4.43 | 0 | 3.91 | 2.19 |
| **Crustaceans** | |  |  |  |  |  |  |  |  |  |  |  |  |  |  |  |  |  |  |  |  |
| *Calappa sp.* | 1.2 (0.2) | 1 (0) | 20.5 (0.6) | 2.4 (0.1) | 16.4 (0.8) | 0.9 (0.1) | 0.8 (0) | 0.8 (0) | 0.5 (0) | 0.6 (0.1) | 3.7 (0.1) | 0 (0) | 0.9 (0) | 12.8 (0.7) | 1.1 (0.1) | 1.1 (0.1) | 17.5 (0) | 14.6 (0.1) | 0 (0) | 2.4 (0) | 0.8 (0) |
| *Portunus sanguinolentus* | 2.23 | 0.79 | 27.76 | 2.28 | 18.19 | 0.28 | 0.18 | 0.21 | 0.13 | 0.15 | 7.85 | 0.17 | 0.23 | 16.01 | 0.52 | 0.66 | 11.86 | 6.07 | 0.2 | 3.87 | 0.36 |
| *Thalamita crenata* | 1.4 (0.1) | 0.8 (0.1) | 34.5 (0.9) | 2.1 (0.2) | 12.6 (1.5) | 0.3 (0) | 0.3 (0) | 0.3 (0) | 0.2 (0) | 0.2 (0) | 5.6 (0.1) | 0 (0) | 0.3 (0) | 20.4 (0.5) | 0.5 (0) | 0.4 (0.1) | 10.2 (0.5) | 7 (0.2) | 0.3 (0) | 2.6 (0.4) | 0.3 (0) |
| *Menippe rumphii* | 0.9 (0.1) | 0.8 (0.1) | 24 (0.6) | 2.6 (0.1) | 25.2 (0.3) | 0.5 (0) | 0.5 (0) | 0.5 (0) | 0.3 (0) | 0.4 (0) | 5 (0) | 0.4 (0) | 0.5 (0) | 15.3 (0.4) | 0.7 (0) | 0.6 (0) | 9.7 (0.4) | 7.1 (0.2) | 0.5 (0.1) | 3.9 (0.3) | 0.5 (0) |
| **Bivalves** |  |  |  |  |  |  |  |  |  |  |  |  |  |  |  |  |  |  |  |  |  |
| *Scapharca subcrenata* | 1.94 | 1.68 | 30.81 | 3.88 | 22.76 | 1.79 | 1.67 | 1.87 | 1.25 | 1.54 | 2.31 | 1.73 | 1.86 | 3.57 | 1.86 | 2.04 | 4.41 | 6.55 | 1.91 | 2.85 | 1.75 |
| *Perna viridis* | 3.61 | 2.58 | 25.65 | 3.41 | 13.11 | 2.75 | 2.69 | 2.84 | 2 | 2.44 | 4.66 | 2.76 | 2.85 | 2.87 | 3.07 | 2.8 | 5.27 | 5.71 | 3.05 | 3.26 | 2.63 |
| **Polychaetes** | |  |  |  |  |  |  |  |  |  |  |  |  |  |  |  |  |  |  |  |  |
| *Arenicola cristata* | 4.5 (0.2) | 4.7 (0.1) | 34.2 (0.7) | 6.3 (0.6) | 20.1 (0.2) | 1.4 (0.1) | 1.2 (0.2) | 1.9 (0) | 0.8 (0.2) | 0.9 (0.1) | 3.4 (0.3) | 0.8 (0.3) | 0.5 (0.5) | 4 (0.1) | 2.2 (0.1) | 2.4 (0.1) | 3.8 (0.3) | 1.8 (0.3) | 1.2 (0.1) | 3.2 (0.1) | 1 (0.1) |

Table A4. Result of one-way ANOVA or Mann-Whitney *U*-test for the food sources between summer and winter. Bold-face font indicates significance at *p* < 0.05. A *p*-value of 0 indicates that the actual *p*-value < 0.001.

|  | δ13C | | | |  | δ15N | | | |  | δ34S | | | |
| --- | --- | --- | --- | --- | --- | --- | --- | --- | --- | --- | --- | --- | --- | --- |
|  | df | MS | F/*U* | *p* |  | df | MS | F/U | *p* |  | df | MS | F/U | *p* |
| Seagrass | 1 | 0.08 | 0.13 | 0.726 |  | 1 | 0.904 | 2.369 | 0.155 |  |  |  | 27 | 0.149 |
| Epiphytes |  |  | 15 | 1 |  | 1 | 2.477 | 1.373 | 0.271 |  |  |  | 6 | 0.085 |
| Macroalgae | |  | 0 | **0.0495** |  | 1 | 0.004 | 0.004 | 0.952 |  | 1 | 0 | 0 | 1 |
| SPOM | 1 | 7.415 | 6.099 | 0.069 |  | 1 | 0.047 | 0.119 | 0.747 |  |  |  |  | - |
| SOM | 1 | 0.002 | 0.001 | 0.976 |  | 1 | 2.693 | 2.539 | 0.186 |  | 1 | 8.785 | 1.094 | 0.355 |

Table A5. Summary of Bayesian mixing model (SIMMR) outputs of each macrobenthos showing the four food sources (seagrass, epiphyte, macroalgae, SPOM) to their contribution.

|  |  | Seagrass | | | | |  | Epiphyte | | | | |  | Macroalgae | | | | |  | SPOM | | | | |  |
| --- | --- | --- | --- | --- | --- | --- | --- | --- | --- | --- | --- | --- | --- | --- | --- | --- | --- | --- | --- | --- | --- | --- | --- | --- | --- |
|  |  | Min | 1st Qu. | Median | 3rd Qu. | Max |  | Min | 1st Qu. | Median | 3rd Qu. | Max |  | Min | 1st Qu. | Median | 3rd Qu. | Max |  | Min | 1st Qu. | Median | 3rd Qu. | Max |  |
| Nsa | S | 3.6 | 16.7 | 32.4 | 50.6 | 76.4 |  | 2.6 | 10.9 | 20.9 | 36.7 | 70.9 |  | 2.6 | 11.5 | 21.1 | 33.7 | 62.8 |  | 2.2 | 8.2 | 14.1 | 21.2 | 37.6 |  |
| W | 2.7 | 12.2 | 25 | 42.5 | 79.2 |  | 2.3 | 10.1 | 19.8 | 35.3 | 72.3 |  | 2.2 | 8.8 | 16.5 | 29.8 | 65.4 |  | 2.2 | 9.5 | 19.8 | 34.8 | 68.4 |  |
| Aca | S | 4.2 | 16.8 | 29.3 | 43.3 | 69.9 |  | 3.1 | 11.5 | 20.6 | 32.6 | 61.7 |  | 3.1 | 12.6 | 21.8 | 32.2 | 53.9 |  | 3.6 | 13.4 | 20.6 | 27.9 | 45.3 |  |
| W | 2.6 | 11.8 | 24.2 | 42.5 | 75.8 |  | 2.3 | 11.7 | 23.9 | 41.5 | 76.8 |  | 2.2 | 9.5 | 18.5 | 33 | 68.7 |  | 2.1 | 8.1 | 15.2 | 26.2 | 59.1 |  |
| Csp | S | 2.2 | 8.4 | 15.9 | 29.3 | 64 |  | 2.3 | 9.6 | 18.6 | 33.5 | 66.6 |  | 2.2 | 9.1 | 16.8 | 28.9 | 58.7 |  | 3.5 | 16 | 32.2 | 52.2 | 79.2 |  |
| W | 2.1 | 7.8 | 14.6 | 25.8 | 58.2 |  | 2.4 | 9.9 | 19.8 | 36.8 | 71.9 |  | 3 | 13.4 | 25.1 | 40.3 | 70.7 |  | 2.5 | 10.8 | 21.7 | 40.5 | 72.6 |  |
| Mri | S | 2 | 7.6 | 14.7 | 27 | 62.4 |  | 2.2 | 9.4 | 18.2 | 33.1 | 70.7 |  | 2.1 | 8.4 | 16.3 | 29.8 | 70.9 |  | 2.7 | 14.5 | 30.4 | 55.3 | 79.1 |  |
| W | 2.1 | 7.7 | 14 | 24.9 | 56.5 |  | 2.2 | 9.6 | 18.5 | 32.7 | 69.6 |  | 3.7 | 15.8 | 29.6 | 45.6 | 74.1 |  | 3.1 | 12.9 | 24.2 | 38 | 60.6 |  |
| Pss | S | 1.1 | 3.5 | 6 | 9.9 | 21 |  | 25.3 | 58 | 69.4 | 79.1 | 91.1 |  | 1.1 | 3.7 | 6.4 | 10.1 | 20.1 |  | 1.4 | 6.6 | 14 | 25.8 | 60.9 |  |
| W | 1 | 3.2 | 5.3 | 8.3 | 16.5 |  | 1.4 | 5.4 | 11.5 | 41.7 | 84.5 |  | 3.6 | 33.2 | 46.9 | 56.2 | 76.6 |  | 2.5 | 14.7 | 27.6 | 35.5 | 45.9 |  |
| Tca | S | 2 | 7.2 | 13.5 | 23.9 | 57.1 |  | 2.2 | 9.7 | 18.7 | 34.5 | 65.7 |  | 5.2 | 24.1 | 42.1 | 60.4 | 79.7 |  | 2.3 | 8.5 | 14.7 | 22.3 | 39.1 |  |
| W | 2 | 8.1 | 14.7 | 25.4 | 54.6 |  | 2.1 | 9.1 | 17.3 | 29.9 | 64 |  | 3.5 | 16 | 32.9 | 53.5 | 80.6 |  | 2.5 | 12.1 | 22.1 | 34.4 | 56.6 |  |
| Pvs | S | 2.5 | 9 | 17.6 | 30.9 | 66.7 |  | 2.5 | 9.8 | 18.4 | 32 | 66.9 |  | 2.2 | 8.7 | 17.2 | 30.1 | 63.9 |  | 3.2 | 14.9 | 29.5 | 49.6 | 78.9 |  |
| W | 2.3 | 8.3 | 15.1 | 24.5 | 52.2 |  | 2.3 | 8.3 | 15 | 24.8 | 53.6 |  | 2.1 | 8.5 | 15.4 | 26.4 | 59.9 |  | 7.1 | 32.9 | 46.1 | 56.3 | 73.4 |  |
| Ssa | S | 2.1 | 8.9 | 17 | 29.5 | 65.8 |  | 2.4 | 9.8 | 18.8 | 32.4 | 66.3 |  | 2.3 | 9.3 | 17.9 | 31.3 | 64.4 |  | 3.4 | 14.7 | 29.1 | 49.4 | 77.9 |  |
| W | 2.3 | 8.1 | 14.5 | 26.2 | 60.2 |  | 2 | 7.9 | 14.9 | 25.4 | 60 |  | 2.2 | 8.9 | 16.5 | 28.6 | 62.2 |  | 4.7 | 24 | 43 | 56.8 | 76.2 |  |

Note: SPOM represents suspended particulate organic matter. The Min, 1 st Qu., 3rd Qu. and Max represent 2.5%, 25%, 75% and 97.5% credible intervals of SIMMR outputs.
